# Supplementary material for: Exploration of Na2.65Ti3.35Fe0.65O9as anode materials for Na-ion batteries
Source: Royal Society of Chemistry journal article supplement (doi:10.1039/c4cc09436k), 2015-01-01
Supplement: c4cc09436k1.pdf [file c4cc09436k1.pdf]

## Supporting Information

### Exploration of $\text{Na}_{2.65}\text{Ti}_{3.35}\text{Fe}_{0.65}\text{O}_9$ as anode materials for Na-ion batteries

Maowen Xu<sup>a,b,\*†</sup>, Jun-Ke Hou<sup>a,b†</sup>, Yu-Bin Niu<sup>a,b</sup>, Guan-Nan Li<sup>a</sup>, Yu-Tao Li<sup>c</sup>, Chang Ming Li<sup>a,b\*</sup>

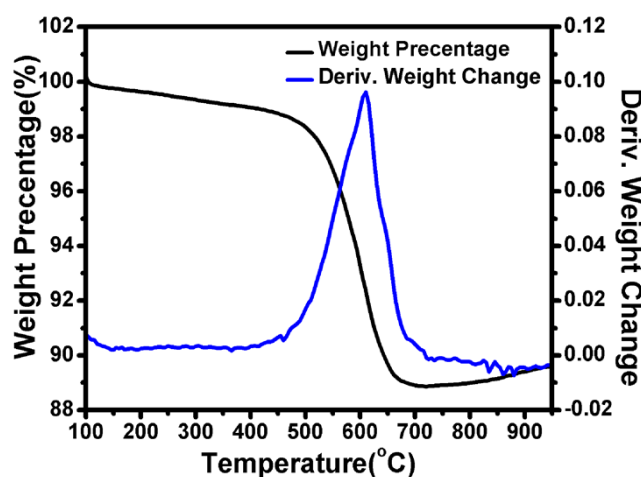

Fig.S1. TGA of precursor of  $\text{Na}_{2.65}\text{Ti}_{3.35}\text{Fe}_{0.65}\text{O}_9$

The thermal properties of the obtained  $\text{Na}_{2.65}\text{Ti}_{3.35}\text{Fe}_{0.65}\text{O}_9$  precursor were studied using TG analysis. Fig. S1 displays the TG curve for the  $\text{Na}_{2.65}\text{Ti}_{3.35}\text{Fe}_{0.65}\text{O}_9$  precursor. It shows a first weight loss around 400°C, which is attributed to the evaporation of residual water and the removal of chemically bound water in the sample. The following sharp drop in weight above 700 °C corresponds to the decomposition of raw materials and the formation of  $\text{Na}_{2.65}\text{Ti}_{3.35}\text{Fe}_{0.65}\text{O}_9$  phase. The weight loss between 700 and 900°C is very little. This behavior implies that the formation of  $\text{Na}_{2.65}\text{Ti}_{3.35}\text{Fe}_{0.65}\text{O}_9$  phase is completed at this stage. So, the samples were annealed at 750 °C, 800 °C, 850 °C and 900 °C in this work.

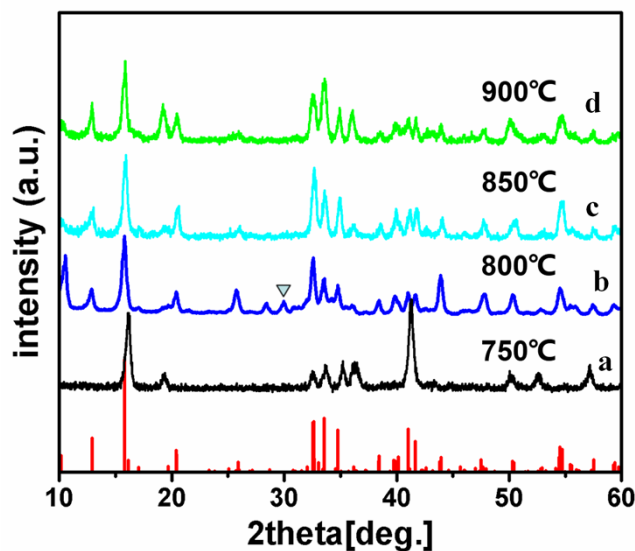

Fig.S2. XRD patterns of samples obtained at different temperature

The XRD patterns of the as-synthesized samples display in Fig.S2. The results suggested that the  $\text{Na}_{2.65}\text{Ti}_{3.35}\text{Fe}_{0.65}\text{O}_9$  has been formed after sintering at 700 °C, and with the increasing of sintering temperature, the crystallinity of the samples increased. It is clearly that the main diffraction peaks positions of the materials obtained at 800 °C agree well with  $\text{Na}_{2.65}\text{Ti}_{3.35}\text{Fe}_{0.65}\text{O}_9$  (PDF No.04-014-0704). However, there are still weak impurity peaks at 21.5° and 30°, it showed that the obtained product at 800 °C still contains trace amounts of impurities. After sintering at 850 °C and 900 °C, the XRD results (Fig.S2c and d) are in good agreement with isostructural  $\text{Na}_{2.1}\text{Ru}_4\text{O}_9$ , suggesting the formation of monoclinic phase crystal.

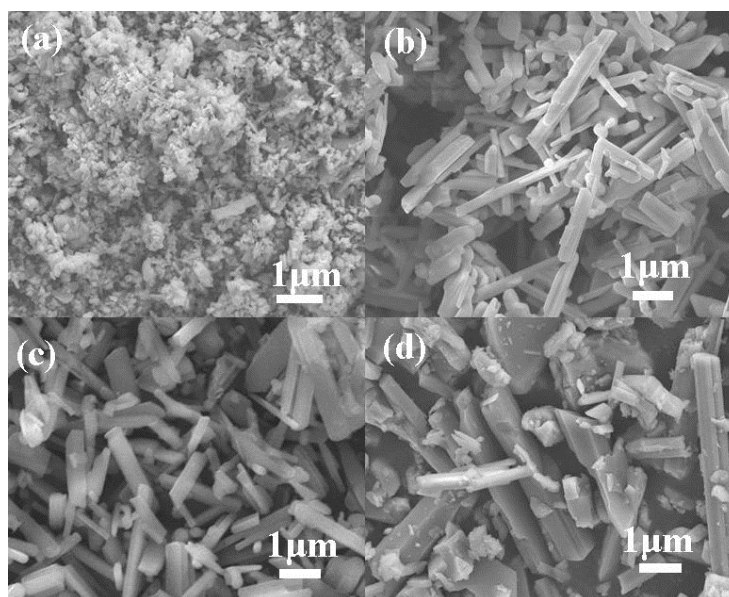

Fig. S3. SEM of the samples obtained at different temperature: (a) 750 °C, (b) 800 °C, (c) 850 °C and (d ) 900 °C for 15h.

Fig.S3 shows SEM images of the four samples obtained at different temperatures. It can be observed that  $\text{Na}_{2.65}\text{Ti}_{3.35}\text{Fe}_{0.65}\text{O}_9$  with rods morphology has begun to form at 800 °C; When sintering temperature increase to 850 °C, more uniform rods can be obtained. With the further increase of temperature, rods become blocks (Fig.S3d).

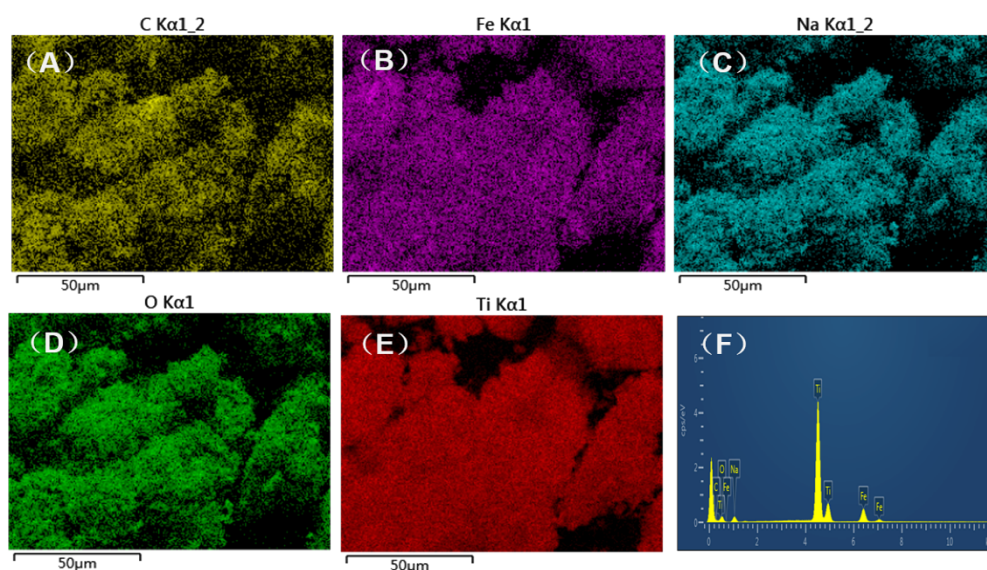

Fig.S4. EDS-element distribution mapping images of  $\text{Na}_{2.65}\text{Ti}_{3.35}\text{Fe}_{0.65}\text{O}_9/\text{C}$ .

The elemental mapping of carbon (Fig. S4(A)) by EDS clearly show that carbon was homogeneously distributed around the  $\text{Na}_{2.65}\text{Ti}_{3.35}\text{Fe}_{0.65}\text{O}_9$  microcrystallites. The EDS elemental mapping results for other elements in the same area are shown in Fig. S4B–E. Although the carbon coating greatly contributed to the excellent rate capability of the  $\text{Na}_{2.65}\text{Ti}_{3.35}\text{Fe}_{0.65}\text{O}_9$  electrode, the carbon coating effect was not significant at a low current rate which typically represents the intrinsic electrochemical performance of new cathode materials.

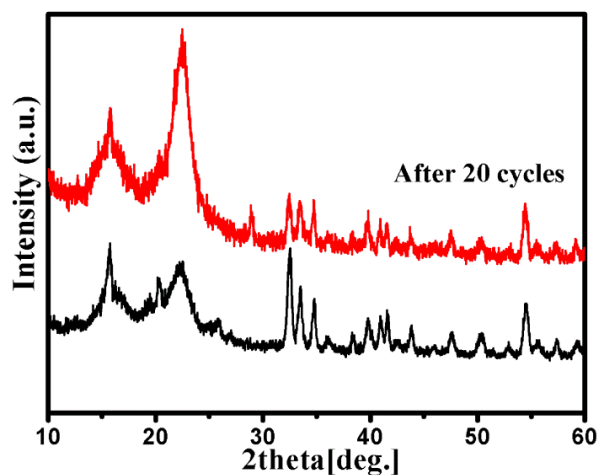

Fig.S5. Structural stability of  $\text{Na}_{2.65}\text{Ti}_{3.35}\text{Fe}_{0.65}\text{O}_9$  upon cycling

The difference between XRD patterns of the pristine electrode and the sample in the discharged state after 20 cycles with a 0.5 C cycling rate was insignificant (Fig. S5), indicating good structural stability during charging/discharging. This implies that  $\text{Na}^+$  ions are immobile in the structure and do not significantly affect the structural evolution upon cycling.
